# Supplementary material
Source: PubMed Central journal article supplement (PMC1074698)

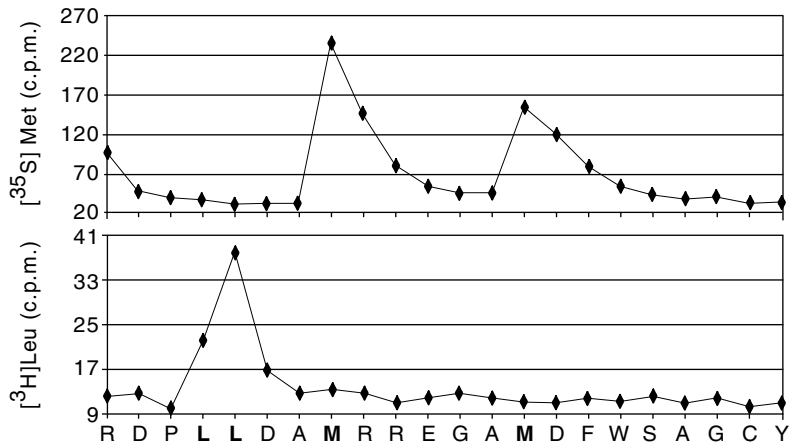

Supplement: pnas_102_14_5144__2.pdf [file pnas_102_14_5144__2.pdf]

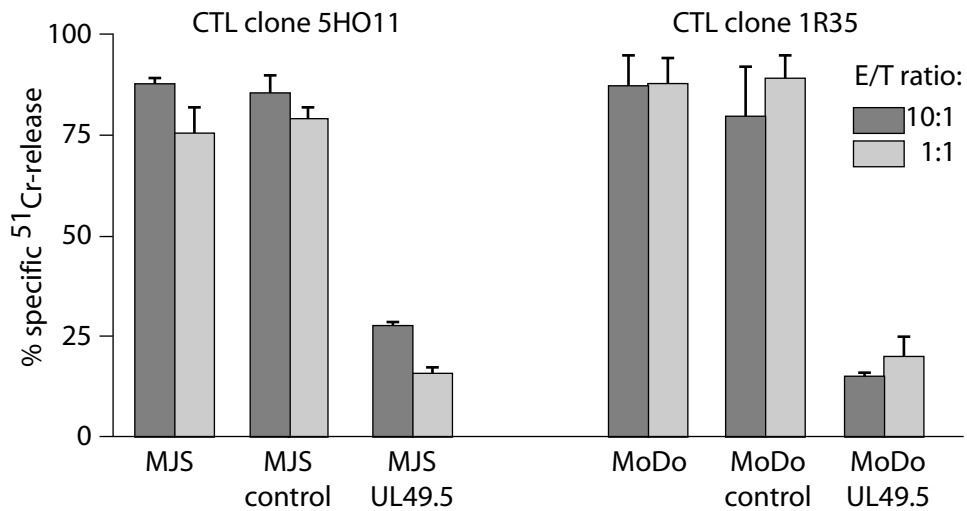

Supplement: pnas_102_14_5144__3.pdf [file pnas_102_14_5144__3.pdf]

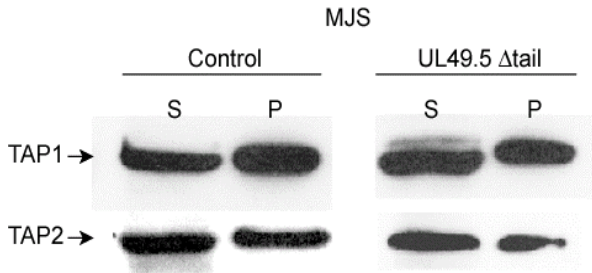

Supplement: pnas_102_14_5144__4.pdf [file pnas_102_14_5144__4.pdf]

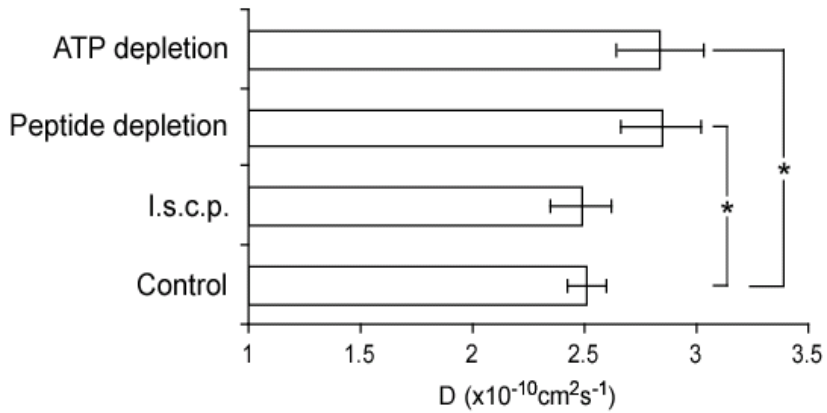

Supplement: pnas_102_14_5144__5.pdf [file pnas_102_14_5144__5.pdf]

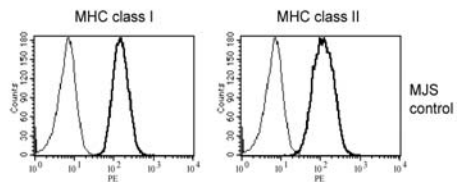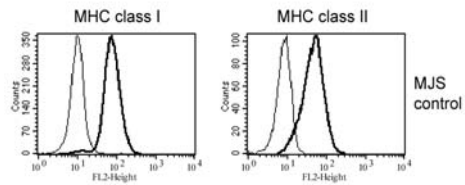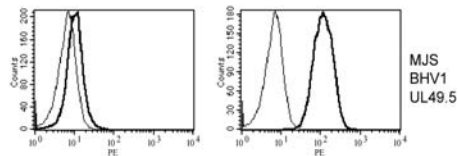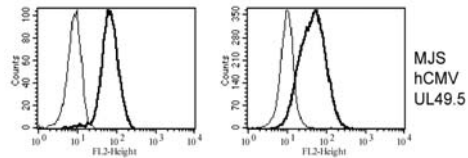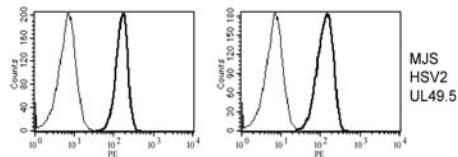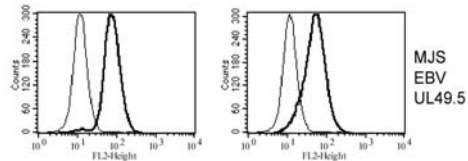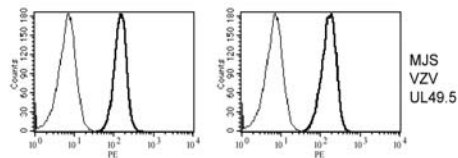

Supplement: pnas_102_14_5144__6.pdf [file pnas_102_14_5144__6.pdf]
